# Supplementary material
Source: PubMed Central journal article supplement (PMC6629156)
Supplement: jciinsight-4-125157-s075.pdf [file jciinsight-4-125157-s075.pdf]

**Supplemental Table 4.** List of qPCR primer sequences.

| <b>Primer name</b> | <b>Sequence</b>            |
|--------------------|----------------------------|
| hALB-F             | TGAAACATACGTTCCCAAAGAGTT T |
| hALB-R             | CTCTCCTTCTCAGAAAGTGTGCATAT |
| 7p14.3-F           | GCCTACCAACTACCCTGTTT       |
| 7p14.3-R           | TTCATAGTGGGCCTTTGTATCA     |
| 7q11.22-F          | TCACCGTAAGTGCTGTCAAC       |
| 7q11.22-R          | CCTTACACACCCAGAGACAATC     |
| 7q21.12-F          | GACAGCGTTTCCCTGTAAGT       |
| 7q21.12-R          | GTGTCTGACCCTGTGAGTATTG     |
| 7q31.2-F           | AGGAAAGTGGGTGACTGGGTTTCA   |
| 7q31.2-R           | TAGTGTTTGCTGGCAATCCTTGGC   |
| 7q35-F             | GAGACCAAAGGAGAAGTGAAGG     |
| 7q35-R             | CCTCCCAGCCCAATGTAATAG      |
| MMP9-F             | AGACCTGGGCAGATTCCAAAC      |
| MMP9-R             | CGGCAAGTCTTCCGAGTAGT       |
| IMPDH1-F           | GCACACTGTGGGCGAT           |
| IMPDH1-R           | GAG CCA CCA CCA GTT CA     |
| S100A11-F          | ATGGCAAAAATCTCCAGCCCT      |
| S100A11-R          | TGTGAAGGCAGCTAGTTCTGTA     |
| ASNS-F             | CATTACAACAGTTCGTGCTTCAG    |
| ASNS-R             | CACCACGCTATCTGTGTTCTT      |
| ACTA2-F            | CTATGCCTCTGGACGCACAAC      |
| ACTA2-R            | CAGATCCAGACGCATGATGGCA     |
| IFRD1-F            | TGCAGTGGTTATAGCGATCCT      |
| IFRD1-R            | CCTTGTCTTCGCACTCTTATCC     |
| SCCPDH-F           | TCCCGCTCATTGGTCCAAAAT      |
| SCCPDH-R           | CATACGCAGCATACTGAACTGG     |
| CAV1-F             | GCGACCCTAAACACCTCAAC       |
| CAV1-R             | ATGCCGTCAAACTGTGTGTC       |
| CAV2-F             | AAGACCTGCCTAATGGTTCTGC     |
| CAV2-R             | CTCGTACACAATGGAGCAATGAT    |
| MET-F              | AGCAATGGGGAGTGTAAGAGG      |
| MET-R              | CCCAGTCTTGTACTCAGCAAC      |
| SERPINE1-F         | AGTGGACTTTTCAGAGGTGGA      |
| SERPINE1-R         | GCCGTTGAAGTAGAGGGCATT      |
| COL7A1-F           | TTACGCCGCTGACATTGTGTT      |
| COL7A1-R           | ACCAGCCCTTCGAGAAAGC        |
| COL1A2-F           | GGCCCTCAAGGTTTCCAAGG       |
| COL1A2-R           | CACCCTGTGGTCCAACAAC        |
